# Supplementary material for: Construction of an oxygen vacancy-enriched triple perovskite oxide electrocatalyst for efficient and stable oxygen evolution in acidic media
Source: Royal Society of Chemistry journal article supplement (doi:10.1039/d4qi01536c), 2024-01-01
Supplement: d4qi01536c1.pdf [file d4qi01536c1.pdf]

## *Supporting Information:*

### **Construction of Oxygen Vacancies-Enriched Triple Perovskite Oxide Electrocatalyst for Efficient and Stable Oxygen Evolution in Acidic Media**

*Yuanyuan Wu<sup>a</sup>, Tixuan Xia<sup>b</sup>, Lu Yang<sup>a</sup>, Feifan Guo<sup>c</sup>, Wei Jiang<sup>b</sup>, Jihui Lang<sup>d</sup>, Yunchao Ma<sup>a</sup>,*

*Jingdong Feng<sup>a</sup>, Guangbo Che<sup>e\*</sup>, Chunbo Liu<sup>b\*</sup>*

*<sup>a</sup> Key Laboratory of Preparation Application of Environmental Friendly Materials, Ministry of Education, College of Chemistry, Jilin Normal University, Siping 136000, P. R. China*

*<sup>b</sup> Jilin Joint Technology Innovation Laboratory of Developing and Utilizing Materials of Reducing Pollution and Carbon Emissions, College of Engineering, Jilin Normal University, Siping, 136000, P. R. China.*

*<sup>c</sup> Key Laboratory of Polyoxometalate and Reticular Material Chemistry of Ministry of Education, Faculty of Chemistry, Northeast Normal University, Changchun, 130024, China*

*<sup>d</sup> Key Laboratory of Functional Materials Physics and Chemistry of the Ministry of Education, Jilin Normal University, Changchun, 130103, China*

*<sup>e</sup> College of Chemistry, Baicheng Normal University, Baicheng, 13700, P. R. China*

*\* Corresponding author: Guangbo Che (guangboche@jlnu.edu.cn); Chunbo Liu (chunboliu@jlnu.edu.cn)*

## 1. Experimental Section

### 1.1 Chemicals and Reagents

Potassium hexachloroiridate(IV) ( $\text{K}_2\text{IrCl}_6$ , 99.99%) and ruthenium(IV) oxide ( $\text{RuO}_2$ , 99%) were purchased from Aladdin. Ruthenium chloride hydrate ( $\text{RuCl}_3 \cdot x\text{H}_2\text{O}$ , 99%), citric acid ( $\text{C}_6\text{H}_8\text{O}_7$ ), Nafion<sup>®</sup> perfluorinated resin solution, strontium acetate ( $\text{C}_4\text{H}_6\text{O}_4\text{Sr}$ ) and isopropyl alcohol ( $((\text{CH}_3)_2\text{CHOH})$ ) were purchased from Shanghai Macklin Biochemical Co., Ltd. Ethylene glycol ( $((\text{CH}_2\text{OH})_2)$ ) were purchased from Beijing Chemical Factory. Hydrochloric acid ( $\text{HCl}$ ), Sulfuric acid ( $\text{H}_2\text{SO}_4$ ) and ethanol absolute ( $\text{C}_2\text{H}_6\text{O}$ ) was purchased from Sinopharm Chemical.

### 1.2 Material Characterizations

The powder X-ray diffraction (XRD) patterns were conducted by a Rigaku D/Max 2550 X-ray diffractometer with  $\text{Cu K}\alpha$  radiation ( $\lambda = 1.5418 \text{ \AA}$ ). The scanning electron microscope (SEM) images were obtained with a Regulus 8100 electron microscope. The transmission electron microscope (TEM) images and high-resolution transmission electron microscopy (HRTEM) images were carried out with a JEM-2100F transmission electron microscope. Energy dispersive X-ray (EDX) analysis was obtained with an EDX system attached to X-MaxN 80T transmission electron microscope (TEM). The XPS measurements were carried out on an ESCALAB 250Xi spectrometer (Thermo Scientific, USA) equipped with a pass energy of 30 eV with a power of 100 W (10 kV and 10 mA) and a mono-chromatized  $\text{AlK}\alpha$  X-ray ( $h\nu=1486.65 \text{ eV}$ ) source. All samples were analyzed under a pressure of less than  $1.0 \times 10^{-9} \text{ Pa}$ .

Spectra were acquired through the *avantage* software (Version 5.979) with a step of 0.05 eV.

### 1.3 DFT calculations

All the DFT calculations were conducted based on the Vienna Ab-initio Simulation Package (VASP) [1-2]. The exchange-correlation effects were described by the Perdew-Burke-Ernzerhof (PBE) functional within the generalized gradient approximation (GGA) method [3-4]. The core-valence interactions were accounted by the projected augmented wave (PAW) method [5]. The energy cutoff for plane wave expansions was set to 450 eV, and the 2×2×1 Monkhorst-Pack grid k-points were selected to sample the Brillouin zone integration. The vacuum space is adopted 15 Å above the surfaces to avoid periodic interactions. The structural optimization was completed for energy and force convergence set at 1.0×10<sup>-4</sup> eV and 0.02 eV Å<sup>-1</sup>, respectively.

The OER calculation in acidic medium includes four-electron transfer procedure, and each reaction step as follows:

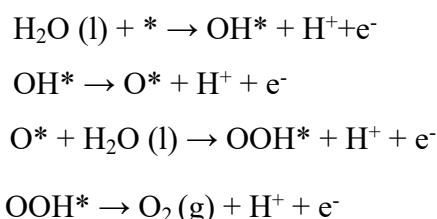

where \* refers to adsorption site of catalyst and \*OOH, \*O, \*OH represent the reaction oxygen intermediates. The Gibbs free energy change ( $\Delta G$ ) of each step is calculated using the following formula:

$$\Delta G = \Delta E + \Delta \text{ZPE} - T\Delta S$$

where  $\Delta E$  is the electronic energy difference directly obtained from DFT calculations,  $\Delta \text{ZPE}$  is the zero point energy difference, T is the room temperature (298.15 K) and  $\Delta S$  is the entropy change. ZPE could be obtained after frequency calculation by [6]:

$$\text{ZPE} = \frac{1}{2} \sum h\nu_i$$

And the TS values of adsorbed species are calculated according to the vibrational frequencies<sup>[7]</sup>:

$$TS = k_B T \left[ \sum_k \ln \left( \frac{1}{1 - e^{-hv/k_B T}} \right) + \sum_k \frac{hv}{k_B T} \frac{1}{(e^{hv/k_B T} - 1)} + 1 \right]$$

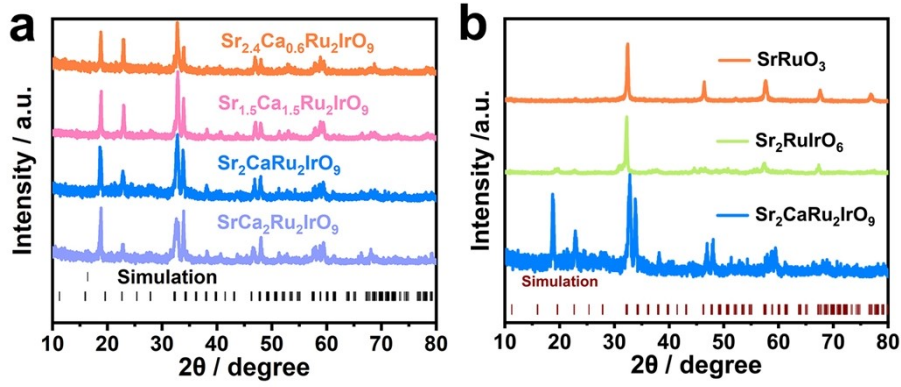

**Fig. S1.** X-ray diffraction (XRD) of (a)  $\text{Sr}_x\text{Ca}_{1-x}\text{Ru}_2\text{IrO}_9$  with different Sr: Ca atomic ratios and (b)  $\text{SrRuO}_3$ ,  $\text{Sr}_2\text{RuIrO}_6$ ,  $\text{Sr}_2\text{CaRu}_2\text{IrO}_9$  and Simulated double perovskite.

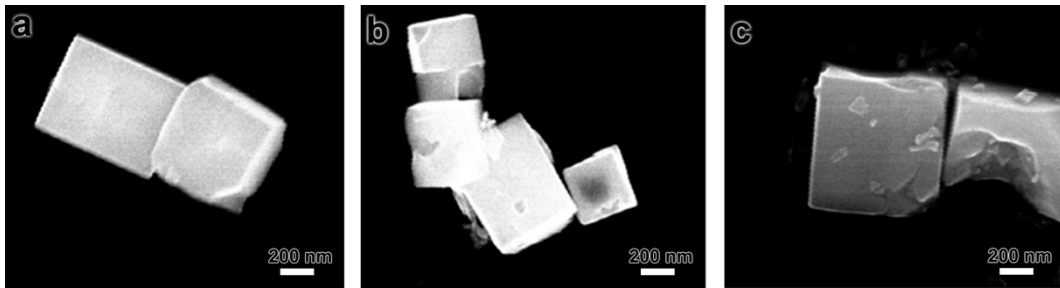

**Fig. S2.** (a-c) Scanning electron microscopy (SEM) of  $\text{Sr}_{2.4}\text{Ca}_{0.6}\text{Ru}_2\text{IrO}_9$ ,  $\text{Sr}_{1.5}\text{Ca}_{1.5}\text{Ru}_2\text{IrO}_9$  and  $\text{SrCa}_2\text{Ru}_2\text{IrO}_9$ .

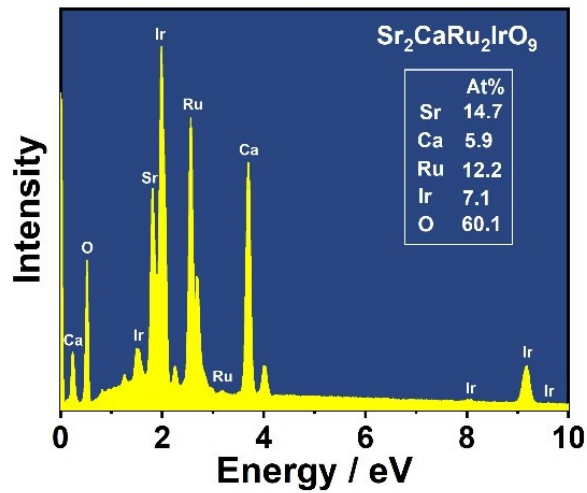

**Fig. S3.** Energy dispersive X-ray spectroscopy (EDX) of  $\text{Sr}_2\text{CaRu}_2\text{IrO}_9$ .

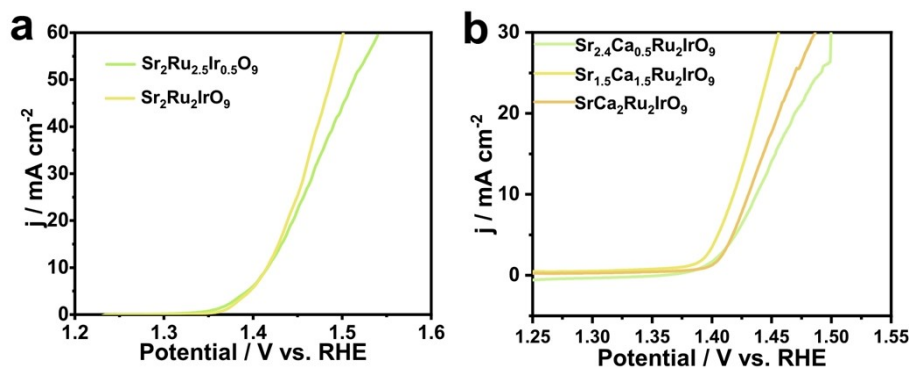

**Fig. S4.** (a) LSV curves of  $\text{Sr}_2\text{Ru}_{2.5}\text{Ir}_{0.5}\text{O}_9$  and  $\text{Sr}_2\text{Ru}_2\text{IrO}_9$ . (b) LSV curves of  $\text{Sr}_x\text{Ca}_{1-x}\text{Ru}_2\text{IrO}_9$  with different Sr: Ca atomic ratios.

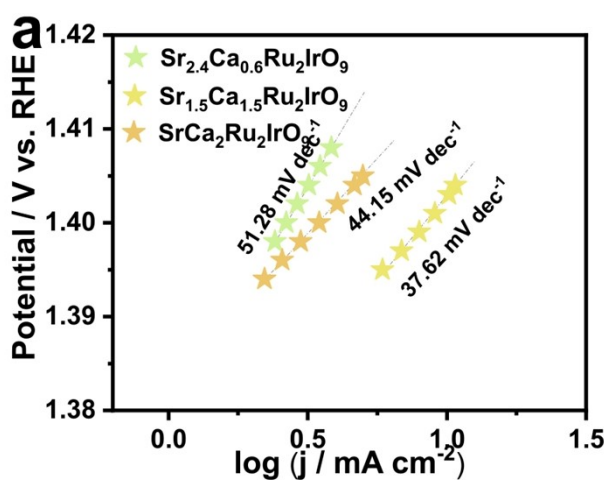

**Fig. S5.** Tafel slope of  $\text{Sr}_x\text{Ca}_{1-x}\text{Ru}_2\text{IrO}_9$  with different Sr: Ca atomic ratios.

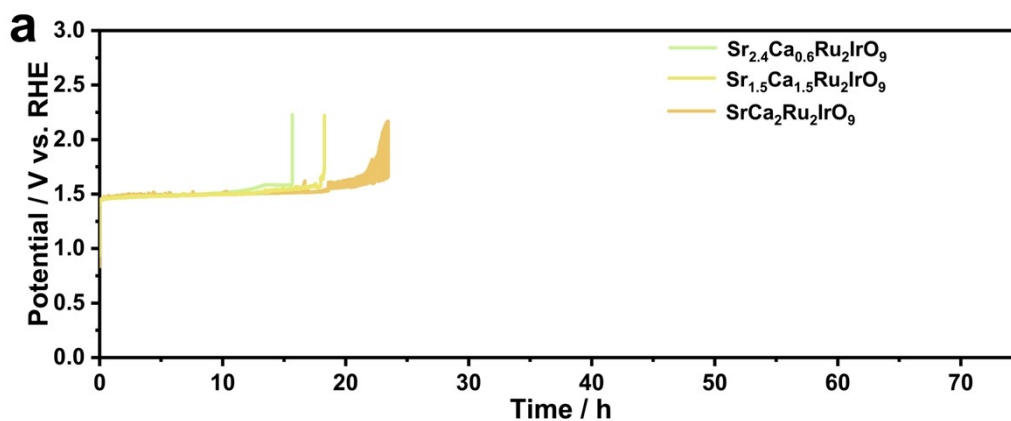

**Fig. S6.** Chronopotentiometry curve of  $\text{Sr}_x\text{Ca}_{1-x}\text{Ru}_2\text{IrO}_9$  with different Sr: Ca atomic ratios.

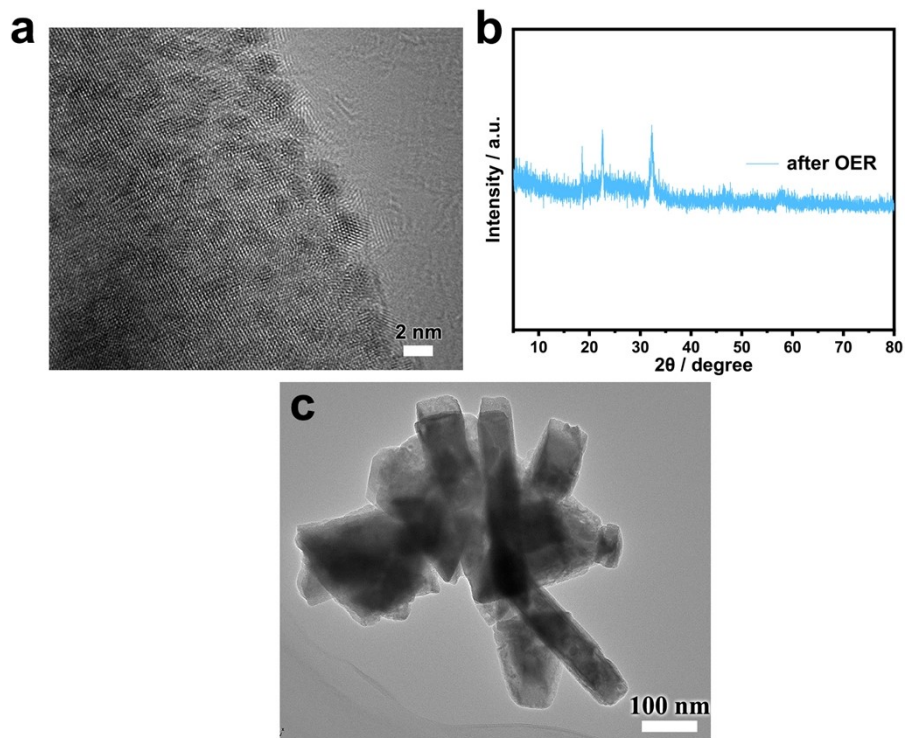

**Fig. S7.** (a) HRTEM images, (b) XRD and (c) TE images of  $\text{Sr}_2\text{CaRu}_2\text{IrO}_9$  after OER.

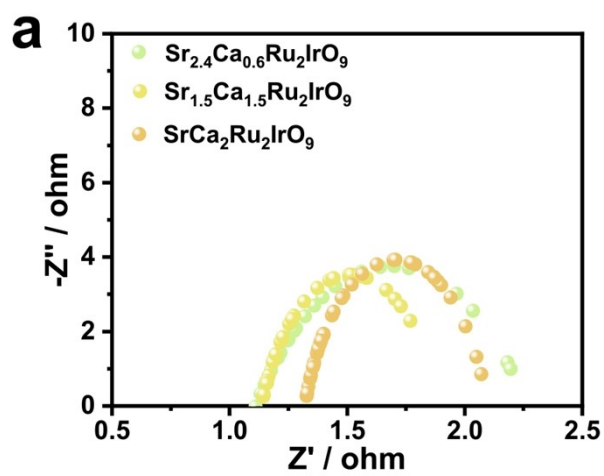

**Fig. S8.** EIS Nyquist plots of  $\text{Sr}_x\text{Ca}_{1-x}\text{Ru}_2\text{IrO}_9$  with different Sr: Ca atomic ratios.

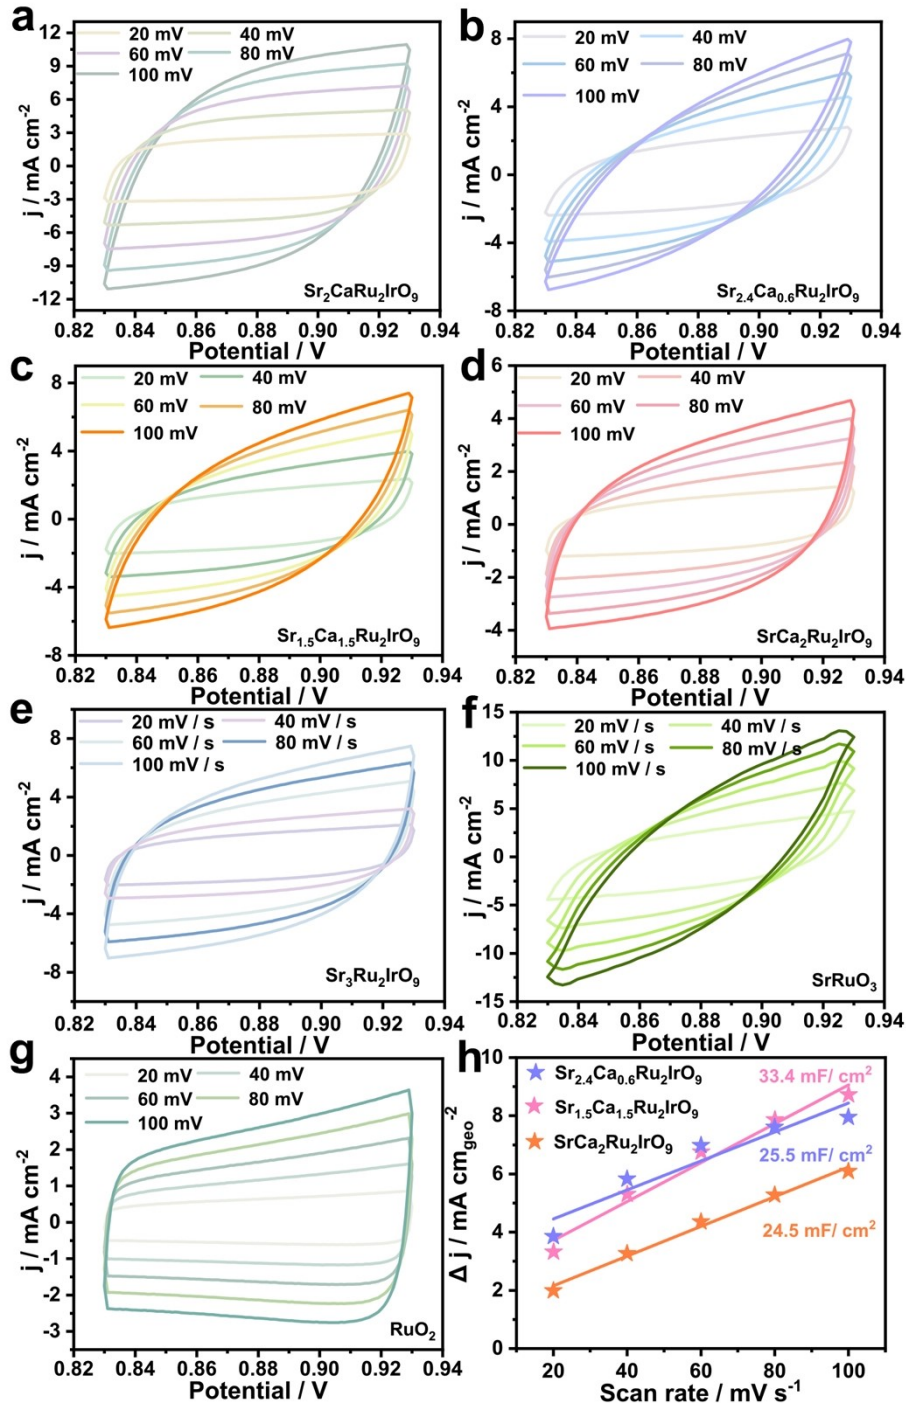

**Fig. S9.** (a-g) CV curve of SrRuO<sub>3</sub>, Sr<sub>3</sub>Ru<sub>2</sub>IrO<sub>9</sub>, RuO<sub>2</sub> and Sr<sub>x</sub>Ca<sub>1-x</sub>Ru<sub>2</sub>IrO<sub>9</sub> with different Sr: Ca atomic ratios. (h) Double-layer capacitance of Sr<sub>2.4</sub>Ca<sub>0.6</sub>Ru<sub>2</sub>IrO<sub>9</sub>, Sr<sub>1.5</sub>Ca<sub>1.5</sub>Ru<sub>2</sub>IrO<sub>9</sub> and SrCa<sub>2</sub>Ru<sub>2</sub>IrO<sub>9</sub>.



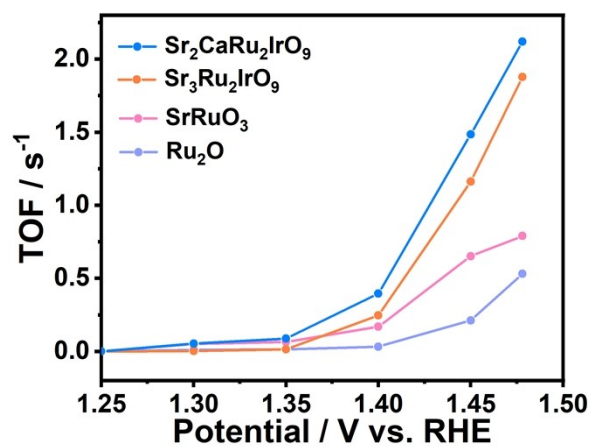

**Fig. S10.** TOF values of Sr<sub>2</sub>CaRu<sub>2</sub>IrO<sub>9</sub>, Sr<sub>3</sub>Ru<sub>2</sub>IrO<sub>9</sub>, SrRuO<sub>3</sub> and commercial RuO<sub>2</sub>.

## References

- [1] G. Kresse, J. Hafner, Ab Initio Molecular Dynamics for Liquid Metals, *Phys. Rev. B*, **1993**, 47, 558-561.
- [2] G. Kresse, J. Hafner, Ab Initio Molecular-Dynamics Simulation of the Liquid-Metal-Amorphous-Semiconductor Transition in Germanium, *Phys. Rev. B*, **1994**, 49, 14251-14269.
- [3] J. P. Perdew, K. Burke, M. Ernzerhof, Generalized Gradient Approximation Made Simple. *Phys. Rev. Lett.*, **1996**, 77, 3865-3868.
- [4] G. Kresse, D. Joubert, From Ultrasoft Pseudopotentials to the Projector Augmented-Wave Method. *Phys. Rev. B*, **1999**, 59, 1758-1775.
- [5] P. E. Blöchl, Projector Augmented-Wave Method, *Phys. Rev. B*, **1994**, 50, 17953-17979.
- [6] Nørskov JK, Rossmeisl J, Logadottir A, Lindqvist L, Kitchin JR, Bligaard T, Jonsson H. Origin of the overpotential for oxygen reduction at a fuel-cell cathode. *J. Phys. Chem. B*, **2004**, 108, 46, 17886–17892.
- [7] Bendavid LI, Carter EA. CO<sub>2</sub> Adsorption on Cu<sub>2</sub>O(111): A DFT+U and DFT-D Study, *J. Phys. Chem. C*, **2013**, 117, 49, 26048–26059.
